# Supplementary material for: A MnIII2NiII single-chain magnet separated by a thick isolating network of BPh4− anions
Source: Royal Society of Chemistry journal article supplement (doi:10.1039/b718036e), 2008-01-01
Supplement: b718036e.pdf [file b718036e.pdf]

## **Supporting Information**

### **A $\text{Mn}^{\text{III}}_2\text{Ni}^{\text{II}}$ single-chain magnet separated by a Zeolite-like network of $\text{BPh}_4^-$ anions**

Hitoshi Miyasaka,\* Ayumi Saitoh, Masahiro Yamashita and Rodolphe Clérac

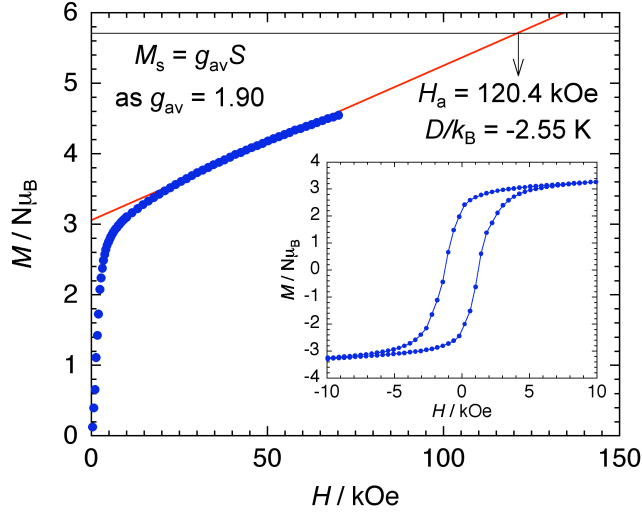

**Fig. S1.** Field dependence of the initial magnetization on a polycrystalline sample of  $\text{Mn}_2\text{Ni-BPh}_4$  at 1.82 K. The solid red line represents a least-square linear fit between 40 – 70 kOe and the solid black line represents the value of  $M_s = g_{av}S$  as  $S = 3$  and  $g_{av} = 1.90$  estimated from the simulation of high temperature susceptibilities. Inset: the magnetization variation by field sweep between  $\pm 70$  kOe.

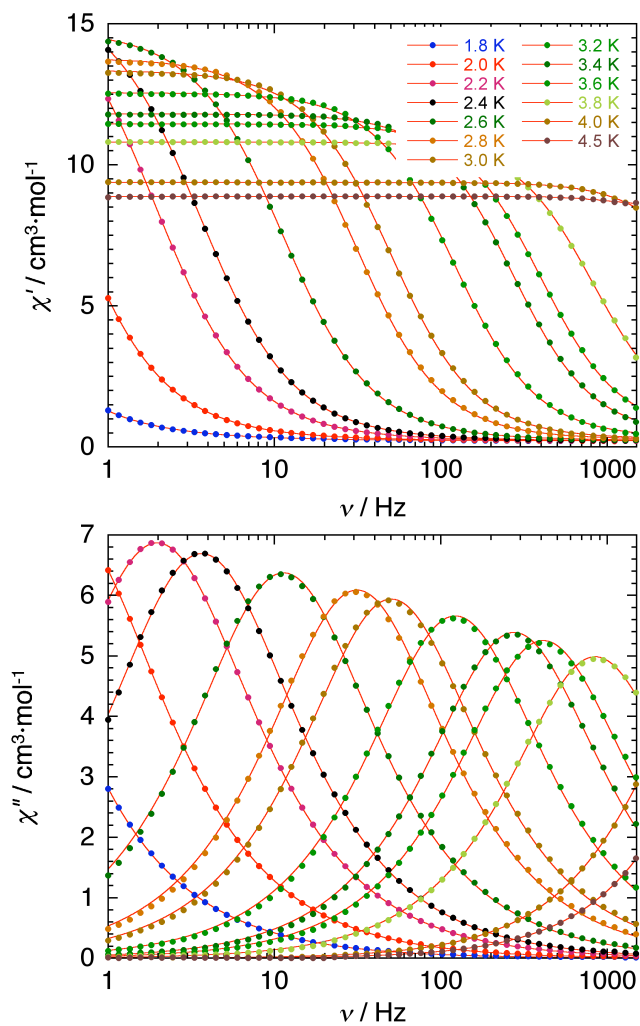

**Fig. S2.** Frequency dependence of ac susceptibility measured at several temperatures in the range of 1.8 – 4.5 K. Solid curves represent the least-squared fit using a generalized Debye model with  $\alpha < 0.1$  through the measured temperature range.

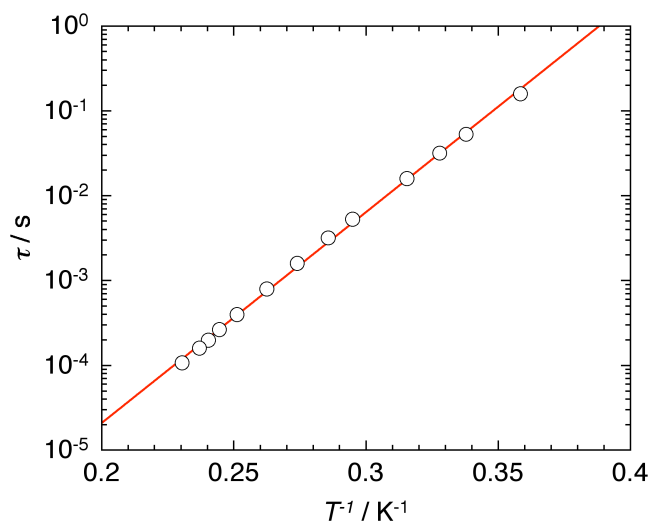

**Fig. S3.** Relaxation time ( $\tau$ ) vs.  $1/T$  of **Mn<sub>2</sub>Ni-BPh<sub>4</sub>**. Solid line represents the least-squares exponential fitting curve.
